# Supplementary material for: Biomass-derived monomers for performance-differentiated fiber reinforced polymer composites
Source: Royal Society of Chemistry journal article supplement (doi:10.1039/c7gc00320j), 2017-01-01
Supplement: c7gc00320j1.pdf [file c7gc00320j1.pdf]

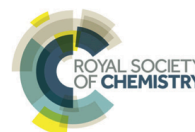

# Green Chemistry

PAPER

[View Article Online](#)  
[View Journal](#) | [View Issue](#)

## Biomass-derived monomers for performance-differentiated fiber reinforced polymer composites

Nicholas A. Rorrer<sup>a</sup>, Derek R. Vardon<sup>a</sup>, John R. Dorgan<sup>b</sup>, Erica J. Gjersing<sup>a</sup>, Gregg T. Beckham<sup>a,\*</sup>

### Additional Figures

**Table S1.** Molecular properties of the synthesized FRPs. Isomerization is reported as the total of the diacid the isomerized.

| Olefinic Monomer                     | % of Diacid Loading | Incorporation | M <sub>w</sub> (x10 <sup>-4</sup> ) | PDI     | Isomerization (cis,cis to cis,trans) | Isomerization (All cis to all trans) | Yield (mass basis) |
|--------------------------------------|---------------------|---------------|-------------------------------------|---------|--------------------------------------|--------------------------------------|--------------------|
| <b>Maleic Anhydride</b>              | 10                  | 9.8           | 1.95                                | 2.0±0.1 | -                                    | 1                                    | 96%                |
|                                      | 25                  | 25.6          | 1.89                                | 2.0±0.1 | -                                    | 5                                    | 97%                |
|                                      | 50                  | 49.7          | 1.70                                | 2.0±0.1 | -                                    | 7                                    | 92%                |
|                                      | 75                  | 74.3          | 1.61                                | 2.0±0.1 | -                                    | 11                                   | 89%                |
|                                      | 100                 | 100           | 1.54                                | 2.0±0.1 | -                                    | 12                                   | 93%                |
| <b>Fumaric Acid</b>                  | 10                  | 10.2          | 1.97                                | 2.0±0.1 | -                                    | -                                    | 96%                |
|                                      | 25                  | 24.2          | 1.82                                | 2.0±0.1 | -                                    | -                                    | 93%                |
|                                      | 50                  | 47.1          | 1.57                                | 2.0±0.1 | -                                    | -                                    | 95%                |
|                                      | 75                  | 77.2          | 1.42                                | 2.0±0.1 | -                                    | -                                    | 91%                |
|                                      | 100                 | 100           | 1.31                                | 2.0±0.1 | -                                    | -                                    | 86%                |
| <b>cis,cis Dimethyl Muconate</b>     | 10                  | 9.6           | 1.91                                | 2.0±0.1 | -                                    | -                                    | 95%                |
|                                      | 25                  | 23.7          | 1.78                                | 2.0±0.1 | 5                                    | 1                                    | 93%                |
|                                      | 50                  | 50.1          | 1.32                                | 2.0±0.1 | 10                                   | 3                                    | 90%                |
|                                      | 75                  | 76.2          | 1.21                                | 2.0±0.1 | 19                                   | 6                                    | 85%                |
|                                      | 100                 | 100           | 1.01                                | 2.0±0.1 | 21                                   | 4                                    | 87%                |
| <b>trans,trans Dimethyl Muconate</b> | 10                  | 9.8           | 1.95                                | 2.0±0.1 | -                                    | -                                    | 97%                |
|                                      | 25                  | 24.1          |                                     | 2.0±0.1 | -                                    | -                                    | 96%                |
|                                      | 50                  | 50.3          |                                     | 2.0±0.1 | -                                    | -                                    | 91%                |
|                                      | 75                  | 76.2          |                                     | 2.0±0.1 | -                                    | -                                    | 89%                |
|                                      | 100                 | 100           | 1.26                                | 2.0±0.1 | -                                    | -                                    | 90%                |

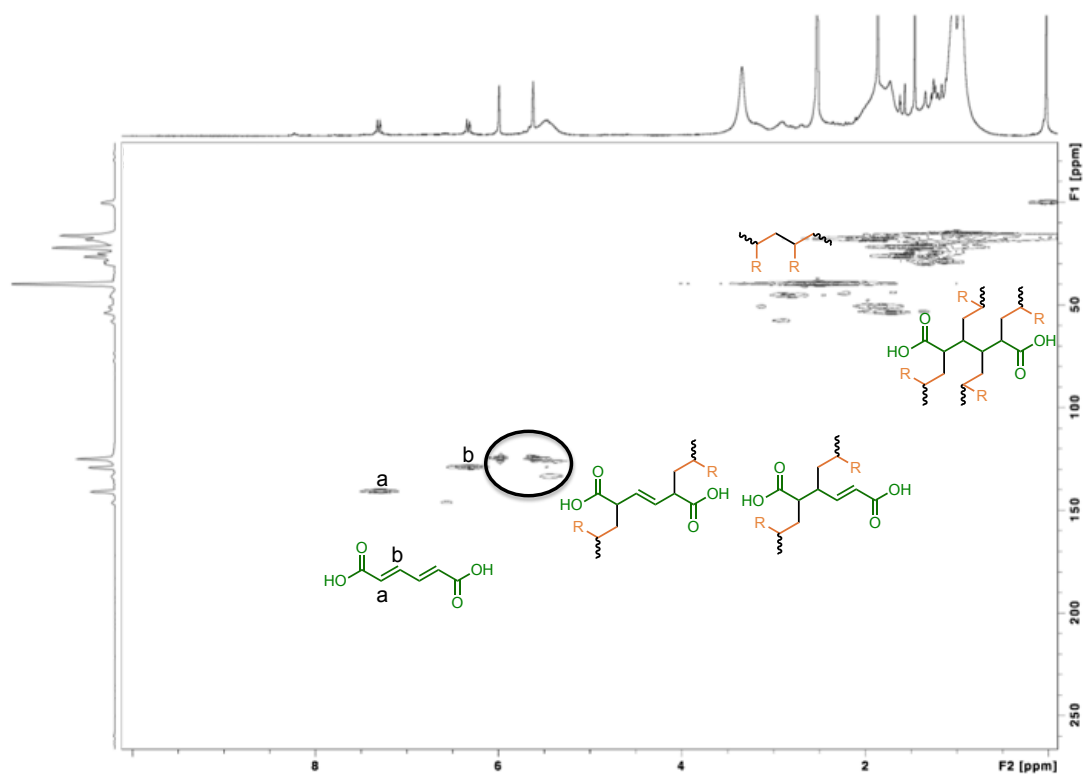

**Figure S1.** 2D NMR of the *trans,trans*-muconic acid/methacrylic acid polymer in  $d_6$ -DMSO.

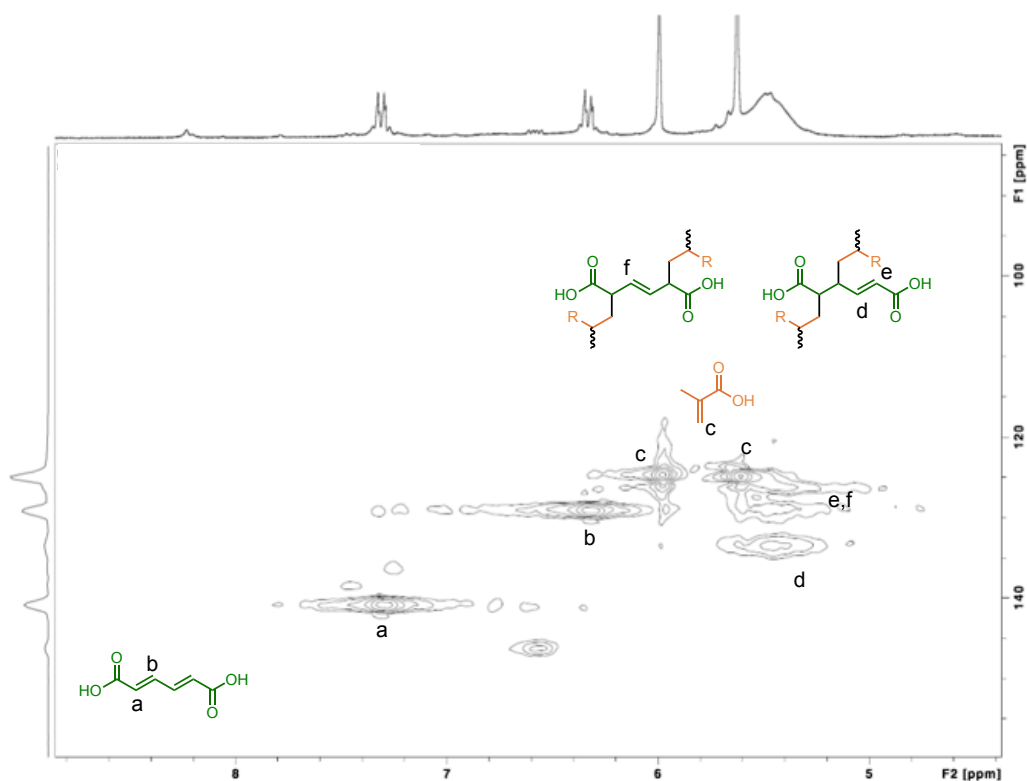

**Figure S2.** 2D NMR of the *trans,trans*-muconic acid/methacrylic acid polymer in  $d_6$ -DMSO zoomed in on the olefinic polymer region with peaks labeled.

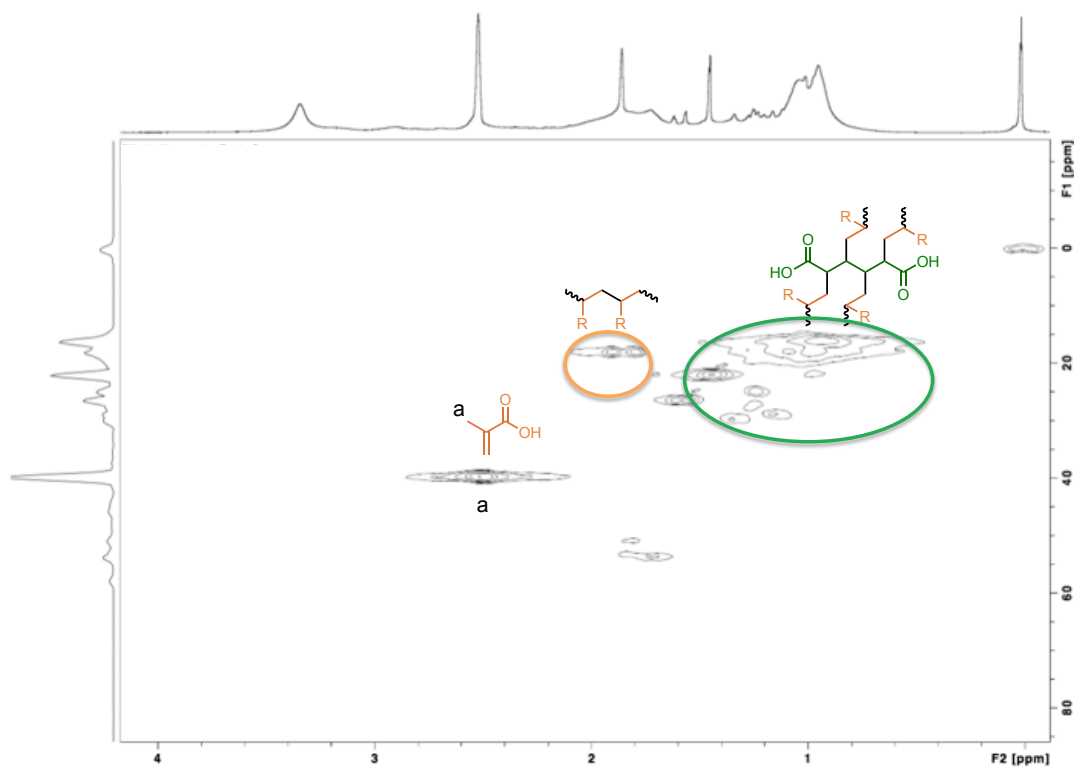

**Figure S3.** 2D NMR of the *trans,trans*-muconic acid/methacrylic acid polymer in  $d_6$ -DMSO zoomed in on the olefinic polymer region with peak regions labeled as to what structure they correspond to.

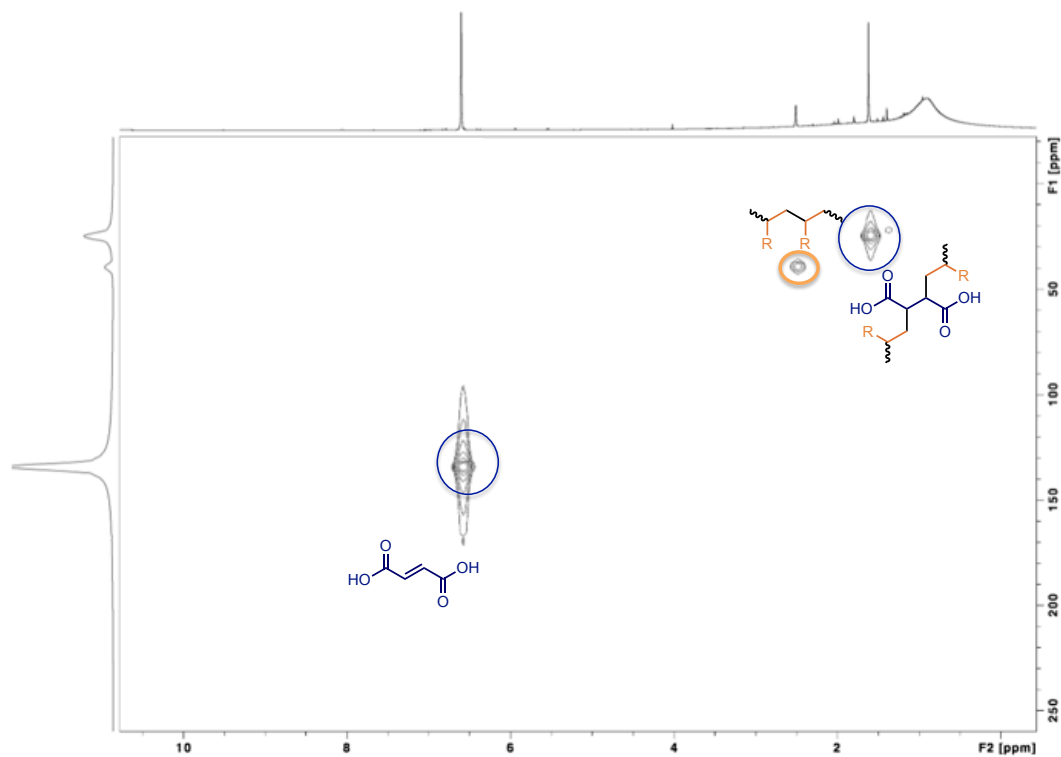

**Figure S4.** 2D NMR of the fumaric acid/methacrylic acid polymer in  $d_6$ -DMSO. There is little methacrylic acid left over and the corresponding polymer regions are circled.

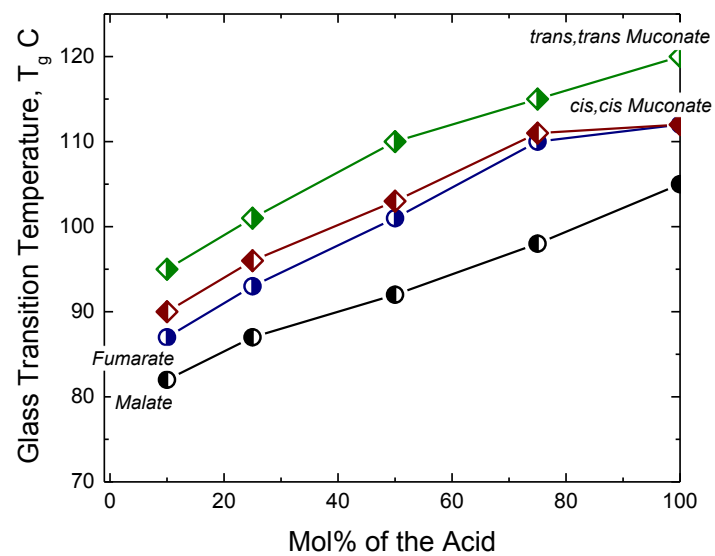

**Figure S5.** Glass transition temperatures of the methacrylic acid synthesized FRPs.
